# Supplementary material for: miR-22/TET2/p53-Feedback Loop Regulates Cell Proliferation and Apoptosis of k562 cells
Source: Research Square preprint supplement (doi:10.21203/rs.3.rs-113483/v1), 2020-11-25
Supplement: Supplementary file 1 [file be4f1d0a3bba504c4617bf86.docx]

Supplementary Table 1. The siRNA sequence of TET2 used in this study.

| siRNA sequences | sense（5'-3'） | antisense（5'-3'） |
| --- | --- | --- |
| siRNA#1 | GCAACAGACUAAGUCCAUUTT | AAUGGACUUAGUCUGUUGCTT |
| siRNA#2 | GGAUGUAAGUUUGCCAGAATT | UUCUGGCAAACUUACAUCCTT |
| Si-NC | UUCUCCGAACGUGUCACGUTT | ACGUGACACGUUCGGAGAATT |

Supplementary Table 2. The hsa-miR-22 inhibitor and mimics sequence used in this study.

| miRNA sequences | sense（5'-3'） |
| --- | --- |
| inhibitor | UAAAGCUUGCCACUGAAGAACU |
| in-nc | CAGUACUUUUGUGUAGUACAA |
| mimics | AGUUCUUCAGUGGCAAGCUUU  AAAGCUUGCCACUGAAGAACUUU |
| mi-nc | UUCUCCGAACGUGUCACGUTTA  CGUGACACGUUCGGAGAATT |

Supplementary Table 3. The RT-PCR primer used in this study.

| Gene | sense（5'-3'） |
| --- | --- |
| miR-22 | CGAAGCTGCCAGTTGAAGAACTGT |
| H-TET2-F | TGTTAGAAAGGAGACCCGACTG |
| H-TET2-R | AAGCGTTGTAACTCAACAGGAG |
| H-TP53-F | GAGGTTGGCTCTGACTGTACC |
| H-TP53-R | TCCGTCCCAGTAGATTACCAC |
